1 **Pronounced uptake and metabolism of organic substrates by diatoms revealed by pulse-**  
2 **labeling metabolomics**

3  
4 **Authors:** Nils Meyer<sup>1</sup>, Aljoscha Rydzyk<sup>1</sup>, Georg Pohnert<sup>1,2\*</sup>

5 <sup>1</sup>Institute for Inorganic and Analytical Chemistry, Bioorganic Analytics, Friedrich Schiller  
6 University Jena, Lessingstrasse 8, D-07743 Jena, Germany

7 <sup>2</sup>Max Planck Institute for Chemical Ecology, Hans Knöll Str. 8, D-07745 Jena, Germany

8 \*corresponding author: [georg.pohnert@uni-jena.de](mailto:georg.pohnert@uni-jena.de)

9 **Classification:** Biological Sciences, Microbiology, Ecology

10 **Key Words:** Phytoplankton Interactions, Diatoms, absorbotrophy, mixotrophy, mass  
11 spectrometry

12  
13 **Abstract**

14  
15 Diatoms contribute as a dominant group of microalgae to approximately 20% of the global carbon fixation. In  
16 the plankton, these photosynthetic algae are exposed to a plethora of metabolites, especially when competing  
17 algae are lysed. It is well established that diatoms can take up specific metabolites, such as vitamins, amino acids  
18 as nitrogen source, or dimethylsulfoniopropionate to compensate for changes in water salinity. It is, however,  
19 unclear to which extent diatoms take up other organic resources and if these are incorporated into the cell's  
20 metabolism. Here, we ask about the general scope of uptake of metabolites from competitors. Using labeled  
21 metabolites released during lysis of algae grown under a <sup>13</sup>CO<sub>2</sub> atmosphere, we show that the cosmopolitan  
22 diatom *Chaetoceros didymus* takes up organic substrates with little bias and remarkable efficiency. The newly  
23 developed pulse label/ mass spectrometry metabolomics approach reveals that polarity and molecular weight has  
24 no detectable influence on uptake efficiency. We also reveal that the taken-up pool of metabolites is partly  
25 maintained unaltered within the cells but is also subject to catabolic and anabolic transformation. One of the  
26 most dominant phytoplankton groups is thus substantially competing with other heterotrophs for organic  
27 material, suggesting that the observed absorbotrophy may substantially impact organic material fluxes in the  
28 oceans. Our findings call for the refinement of our understanding of competition in the plankton.

29  
30 **Significance** This study demonstrates a remarkably universal uptake of organic substrates by diatoms. The  
31 extent to which one of the most dominant phytoplankton groups is competing for organic material in the plankton  
32 is documented by novel pulse labeling metabolomics studies. Our results show that uptake of organic material by  
33 the photosynthetic microalgae occurs with remarkably little bias. Taken-up metabolites are further transformed by  
34 the diatoms or directly incorporated into the algal metabolome. Our study calls for a re-consideration of organic  
35 material fluxes in the oceans. Also, our understanding of competition in the plankton will have to be refined. The  
36 broader implications for the cycling of resources in plankton communities are discussed within this work.

37  
38

39

## 40 **Introduction**

41 The traditional view on marine plankton distinguishes between phytoplankton as  
42 primary producers and zooplankton as consumers (1). However, many planktonic eukaryotic  
43 organisms have been recognized as mixotrophs, which combine autotrophic photosynthesis  
44 with organic matter uptake (2). Many microzooplankton grazers are mixotrophic and retain  
45 functional algal organelles or even algal endosymbionts. Also photosynthetically active  
46 organisms, such as phytoflagellates and dinoflagellates can engulf and consume prey organisms  
47 to acquire nutrients (3). As an additional strategy, the uptake of dissolved organic carbon termed  
48 absorbotrophic mixotrophy or osmotrophy can be observed in microalgae. This process seems  
49 to be ubiquitous but clearly less understood (4).

50 First investigations of absorbotrophic mixotrophy in plankton focused on algae growth  
51 under extreme darkness in the presence of organic substrates (5, 6). Administration and uptake  
52 studies of radiolabeled substrates deepened our mechanistic understanding. However,  
53 experiments were always limited to investigating one compound or a compound class, such as  
54 specific vitamins or amino acids. It is now clear that absorbotrophic mixotrophy is widely  
55 distributed among planktonic eukaryotic organisms (7). However, the experiments with single  
56 compounds under limiting conditions conducted so far represent an oversimplification and do  
57 not reflect the situation in nature, where a cell is exposed to structurally most diverse  
58 metabolites. Consequently, the importance of absorbotrophic mixotrophy for pelagic food webs  
59 and for element cycling remains elusive and we are still far from quantitatively deciphering the  
60 trophic modes of phytoplankton (8).

61 The availability of organic substrates for uptake will be highly variable. In the plankton  
62 mass occurrences of algae, so-called algal blooms can last over days to weeks before the  
63 population breaks down and is succeeded by other species that become dominant. Especially  
64 during the decay of such algal blooms, the surviving competitors will be exposed to the  
65 metabolites of the lysed algae. Also, lysis of specific phytoplankton members by pathogens,  
66 such as algicidal bacteria or viruses results in situations where surviving resistant cells are  
67 exposed to the metabolomes of the lysed species.(9, 10) It is entirely unclear if and how all  
68 these compounds contribute to the metabolism of the phytoplankton and the potential ecological  
69 importance of phytoplankton as consumers of organic material is thus still poorly understood  
70 (11-14).

71 As critical primary producers, diatoms were initially classified as autotrophs, but the  
72 uptake capability of specific organic molecules was early recognized (14, 15). These include

73 glucose, small polar organic acids such as acetate, succinate, fumarate, malate and lactate,  
74 amino acids, dipeptides and dimethylsulfoniopropionate (DMSP) (16-23). Most experiments  
75 provided mechanistic insight but did not accurately reflect natural conditions, where the water  
76 in which the algae live harbors a diverse mixture of organic compounds. Under natural  
77 conditions, cells are exposed to these metabolites and also light is available to support  
78 photosynthesis. Thus, two competing mechanisms for carbon acquisition, uptake and  
79 heterotrophy will be active. Here we address absorbotrophic mixotrophy in diatoms under non-  
80 limited conditions. The supply of nutrients and light in our study was non-limiting to allow  
81 efficient algal growth; organic metabolites were thus offered in addition to available inorganic  
82 sources.

83 We base our experimental setup on a well-investigated multi-partner interaction  
84 involving an algicidal bacterium and two cosmopolitan diatom species. *Kordia algicida* is a  
85 marine Flavobacterium that possesses algicidal activity leading to cell lysis of several  
86 microalgal species, including the diatom *Skeletonema costatum* (24, 25). *Chaetoceros didymus*,  
87 in contrast, is a naturally co-occurring diatom that is resistant against *K. algicida*. The impact  
88 of *K. algicida* was recently shown in field experiments where it induces a population shift in a  
89 natural phytoplankton community towards resistant algae (26). We hypothesize that during  
90 bacterial lysis of *S. costatum*, resistant species can benefit by taking up metabolites of the lysate  
91 in an absorbotrophic manner. Therefore, we exposed a culture of *C. didymus* to metabolites  
92 from a 50% diluted stationary culture of lysed *S. costatum* cells. We developed a novel  
93 analytical approach to test this hypothesis, including pulse labeling metabolomics and a novel  
94 non-discriminant data treatment routine. We show that uptake and metabolism of metabolites  
95 from the environment occur with remarkable efficiency in the resistant alga.

96

97

## 98 **Results**

### 99 *Generation and evaluation of a labeled metabolome for uptake experiments*

100 A complex medium containing the entire labeled metabolome of a diatom could be  
101 generated from <sup>13</sup>C-labeled *S. costatum*. We grew *S. costatum* in a medium containing Na<sub>2</sub><sup>13</sup>CO<sub>3</sub>  
102 as a sole carbon source to obtain a labeled metabolome. With a repeated exchange of the  
103 medium, we reached up to 65% labeling in the algal metabolome. Mechanical lysis of the  
104 labeled culture and removing the cell debris gives an axenic medium, rich in organic  
105 metabolites (Suppl. Fig. 1).

106 We hypothesized that the resistant *C. didymus* encounters these metabolites also in the  
107 field when algicidal bacteria lyse its competitors. To test this hypothesis, labeled *S. costatum*  
108 cultures were infected with *K. algicida*, which resulted in lysis of more than half of the diatom  
109 cells within six days. Ultrahigh-pressure liquid chromatography-high resolution mass  
110 spectrometry (UHPLC-HRMS) of metabolites extracted from the medium revealed similar  
111 metabolic profiles in mechanically lysed *S. costatum* cells and those lysed by the bacteria (Table  
112 1).

113 Before incubation with *C. didymus*, the metabolites from lysed *S. costatum* were  
114 sterilized and diluted with a medium containing inorganic carbon with normal isotope  
115 distribution (1.1%  $^{13}\text{C}$ , Suppl. Fig. 1). Thereby, we could ensure that  $^{13}\text{C}$  labeled organic  
116 metabolites taken up from the medium can be distinguished from *de novo* synthesized  
117 compounds. Following the same procedure, a control medium was generated using *S. costatum*  
118 cells grown in a medium with natural isotope distribution that could be used to generate mass  
119 spectra for structure elucidation. Using fragmentation trees, database comparison and  
120 subsequent comparison to authentic standards, we identified several of the labeled metabolites  
121 in *C. didymus* (Table 1).

122

### 123 *Evaluation of uptake*

124 For uptake experiments, *C. didymus* was cultivated in a medium containing the sterilized  
125 labeled *S. costatum* metabolome or control medium for three days (n=3). We selected the  
126 concentration of added metabolites to be equivalent to 50% of those released by a lysed  
127 stationary culture. Cells were then recovered by filtration and washed extensively. UHPLC-  
128 HRMS analysis of the *C. didymus* metabolome, after being exposed to this medium under  
129 otherwise optimum growth conditions, revealed that the alga took up substantial amounts of  
130 labeled compounds from various metabolic classes. Quantitative analysis of labeling proved to  
131 be challenging in terms of chemoinformatic data treatment. Therefore, ions of the same  
132 metabolite, only differing in their number of incorporated  $^{13}\text{C}$  were summarized in an  
133 isotopologue group using the software X $^{13}\text{CMS}$  (27). Of 5587 isotopologue groups (positive  
134 and negative ionization mode) detectable in the endo metabolome 2381 were significantly  
135 labeled with  $^{13}\text{C}$  (Fig. 1A). After manual curation, 548 isotopologue groups were categorized  
136 according to their labeling pattern and analyzed regarding their retention time and mass to  
137 charge ratio. The degree of labeling was estimated using the probability mass function for  
138 Bernoulli trials (random experiments with precisely two possible outcomes, “success i.e.

139 incorporation of  $^{13}\text{C}$ ” and “failure i.e. incorporation of  $^{12}\text{C}$ “, in which the probability of success  
140 is the same every time the experiment is conducted):

$$141 \quad I(m) = \frac{n!}{m!(n-m)!} \cdot p^m \cdot (1 - p)^{n-m} \quad (1)$$

142 The degree of labeling  $p$  for a metabolite with  $n$  carbon atoms is estimated from the intensities  
143 of a set of isotopologues  $I(m)$  with  $m$   $^{13}\text{C}$  atoms (28).

144

#### 145 *Classification of taken-up and processed metabolites*

146 We categorized the metabolites according to their degree of labeling (Fig. 1B, C). 73% of the  
147 isotopologue groups were lowly labeled with a degree of labeling  $< 5\%$  indicative of  
148 compounds mainly synthesized *de novo* in *C. didymus*. The low degree of labeling that still  
149 exceeds the natural  $^{13}\text{C}$  content of 1.1% can be explained by general utilization of taken-up  
150 metabolites in the metabolism: metabolites that are assimilated are catabolized to metabolic  
151 building blocks that are used together with the autotrophic metabolic pool and used for  
152 anabolism again. Seven percent of the isotopologue groups were highly labeled. They contained  
153 a degree of labeling similar to that of metabolites in the medium (ca. 65%). The cellular content  
154 of these highly labeled metabolites taken up from lysed *S. costatum* shows that *C. didymus*  
155 assimilates metabolites that it does not (or only to a minimal extent) produce itself. Certain  
156 compounds with a high degree of labeling can be found in *C. didymus* but not in the mixotrophic  
157 medium. These could arise from the metabolic transformation of more complex metabolites  
158 released by *S. costatum*. 15% of the isotopologue groups were labeled in a mixed manner. In  
159 the mass spectrum both, signals from a lowly labeled share and a highly labeled share of the  
160 respective compound can be detected. This pattern can be explained by metabolites that are  
161 biosynthesized by *C. didymus* and also acquired from the medium. This compound class  
162 includes a wide range of natural products, from small charged molecules like choline and  
163 carnitine to non-polar lipids and fatty acids. A few signals (5%) had a complex labeling pattern  
164 that Bernoulli statistics could not describe. These can be interpreted as compounds that result  
165 from metabolites taken up and further metabolized using the pool of *de novo* synthesized  
166 metabolites (Fig. 1B, C). For example, intermediate metabolic products like fatty acids can be  
167 utilized in the anabolism of more complex ones like lipids.

#### 168 *Properties of taken up metabolites*

169 Labeled metabolites span a wide range of polarity from charged small molecules to non-polar  
170 fatty acids. Most labeled products are found in the non-polar region of the chromatogram (Fig.  
171 1D, Tab. 1, Suppl. Fig. 2). The identified polar metabolites that are efficiently taken up include  
172 the amino acids leucine and/or isoleucine and several small charged molecules, namely glycine

173 betaine,  $\beta$ -alanine betaine, carnitine (58% of total cellular carnitine is labeled), and choline.  
174 Also, many fatty acids and lipids are taken up, including oleic acid, 5Z,8Z,11Z,14Z,17Z-  
175 eicosapentaenoic acid, 6Z,9Z,12Z-hexadecatrienoic acid, 6Z,9Z,12Z,15-hexadecatetraenoic  
176 acid, 2-hydroxytetradecanoic acid and isomers of linoleic and arachidonic acid as well as the  
177 lipid 1-oleoyl-*sn*-glycero-3-phosphocholine.  
178 Metabolites that were taken up also span a wide  $m/z$  range, with a maximum between  $m/z$  200  
179 and  $m/z$  700 (Fig. 1D, Tab. 1, Suppl. Fig. 2). There is thus relatively little size discrimination  
180 for the uptake.

181  
182 *Analysis of selected metabolites*  
183 Detailed analyses of the isotopic pattern enabled us to determine the ratio of heterotrophic  
184 uptake to *de novo* biosynthesis and look for evidence of mixed strategies. For example, the  
185 isotopologues of 6Z,9Z,12Z,15-hexadecatetraenoic acid (Fig. 2A) originate from two distinct  
186 pools (Fig. 2D), a lowly labeled pool from *de novo* biosynthesis and a highly labeled pool from  
187 uptake. Modeling with Bernoulli statistics showed that the *de novo* biosynthesis pool had a  
188 degree of labeling of 2.8%, slightly higher than what would be expected from photosynthesis  
189 using exclusively natural inorganic carbon (Fig. 2B). The highly labeled pool has a very similar  
190 isotopologue distribution compared to the fatty acid from the lysed labeled alga (Fig. 2C).  
191 Modeling a mixture of these two pools showed that ca. 20% of the metabolite in the algae results  
192 from uptake, while 80 % are synthesized *de novo*. This complementation of *de novo* synthesized  
193 products with externally available metabolites is observed for several metabolites with variable  
194 proportions of the two sources from only a few percent to nearly 80% of the metabolite acquired  
195 by uptake (Table 1).

196 The isotopologue patterns of metabolites that can be explained by an uptake of resources from  
197 the medium followed by transformations within the cell using the pool of *de novo* synthesized  
198 precursors are more complex. They do not follow the Bernoulli statistics since different  
199 resources can be utilized in different relative amounts. An example is the  
200 lysophosphatidylcholine shown in Fig. 3A. The isotope pattern of the lipid (Fig. 3B) cannot be  
201 interpreted with the model described above, but tandem MS experiments allow to dissecting  
202 the lipid. This reveals a unique labeling pattern for those parts of the molecule that are derived  
203 from different biosynthetic pathways. The isotopologue pattern of oleic acid in the  
204 lysophosphatidylcholine (Fig. 3C) can also not be fitted with a Bernoulli statistic. The fatty acid  
205 is thus assembled using resources that were taken up as well as *de novo* produced. This labeling  
206 pattern in the fatty acid moiety is also observed in free oleic acid and 11Z-eicosenoic acid. Lipid

207 assembly thus does not discriminate between acquired and *de novo* synthesized resources. In  
208 contrast, the choline fragment detected in the same substance shows that most choline is highly  
209 labeled and therefore taken up (Fig. 3D). The glycerol moiety of the molecule is not giving  
210 charged fragments, but its labeling could be established indirectly. Therefore, we conducted  
211 fragmentation of the M+8 isotopologue of the lysophosphatidylcholine. The MS/MS of this ion  
212 gave rise to an oleic acid fragment with isotopologues containing down to zero  $^{13}\text{C}$  (Fig. 3E).  
213 The remaining eight carbon atoms in the uncharged C8-fragment have thus to be labeled in  
214 different degrees. The fragments can thus only be derived from a precursor with labeled, thus  
215 acquired glycerol.

216 These exemplarily discussed mass spectra stand for several hundreds of labeled peaks in the  
217 chromatogram of the metabolome of exposed *C. didymus* (see Fig. 1 and Supporting  
218 information). Using the combined results, we can now draw a picture of the absorbotrophic  
219 metabolism in *C. didymus* (Fig. 4). The uptake introduced here for *C. didymus* is not limited to  
220 this one species but broader distributed in diatoms. When the diatom *Thalassiosira weissflogii*  
221 was raised in the labeled medium as described for *C. didymus*, labeling patterns similar to the  
222 ones described above were detected (data not shown).

223

## 224 **Discussion**

### 225 *$^{13}\text{C}$ labeling allows tracing of metabolic shuttling between microalgae*

226 In order to study potential absorbotrophic mixotrophy in the diatom *C. didymus* a  
227 medium rich in  $^{13}\text{C}$  labeled organic metabolites was prepared by mechanical lysis of a globally  
228 labeled *S. costatum* culture and removal of the cell debris by filtration. The resulting  
229 metabolome enriched medium showed a similar (but labeled) metabolic profile as the medium  
230 of an infection experiment where the lytic bacterium *K. algicida* lysed *S. costatum*. We thus  
231 conclude that *K. algicida* is a sloppy feeder not utilizing the entire algal metabolome but instead  
232 leaving substantial organic resources that it does not require or recover in the water. Surviving  
233 algae, such as the resistant competitor *C. didymus* will be exposed to these metabolites. Earlier,  
234 we observed that such exposure to metabolites released from lysed algae supports the growth  
235 of *C. didymus* if administered at low concentrations. However, no information about the  
236 underlying mechanism was available (29). The ability to take up released organic molecules  
237 may counterbalance the metabolic costs to maintain resistance mechanisms and would be highly  
238 advantageous, for example, during the collapse of a competing algal bloom as it was simulated  
239 in this study (10, 30). If the metabolic uptake also compensates in phases of very dilute  
240 phytoplankton abundance would have to be verified in follow-up studies. We have, however,

241 no indication from the analysis of labeling that there would be a bias for the uptake of higher  
242 concentrated metabolites.

243 We reached up to 65% labeling in the *S. costatum* metabolome using repeated exchange  
244 of medium containing  $\text{Na}_2^{13}\text{CO}_3$  as an exclusive carbon source. Analysis of the *C. didymus*  
245 endometabolome after being exposed to the labeled metabolome of *S. costatum* for 3 days under  
246 otherwise optimum growth conditions revealed that the alga took up substantial amounts of  
247 labeled compounds from various metabolic classes. Given that analysis of every single  
248 isotopologue of a labeled metabolite would generate highly complex and partially redundant  
249 information, we reverted to a statistical treatment assuming that labeling results in an  
250 isotopologue distribution that can be described with a Bernoulli statistic. Indeed, this data  
251 treatment allowed to match mass spectral patterns of labeled metabolites to predicted spectra  
252 that would result from specific degrees of labeling. Thereby the average 65% labeling of the  
253 metabolome could be determined.

254 Labeling patterns of metabolites in *C. didymus* after exposure to  $^{13}\text{C}$ -labeled *S. costatum*  
255 medium

256 Analysis of the metabolome of the resistant alga *C. didymus* after exposure to  $^{13}\text{C}$ -  
257 labeled *S. costatum* revealed unlabeled metabolites, metabolites with unaltered full labeling and  
258 those with more complex mass spectra that could be assigned to different metabolic processing  
259 (Fig. 1). The methodology described here thus not only shows the uptake of one metabolite, but  
260 allows simultaneous quantification of the uptake and analysis of the metabolic fate of all taken  
261 up metabolites in the receiving alga. This is a valuable expansion of the classical fluxomics  
262 approach, where feeding of one single labeled metabolite to heterotrophs can only reveal its  
263 uptake and metabolism. Our experimental approach reflects the situation in the plankton with  
264 highly complex microbial communities and complex exometabolomes (31). It allows  
265 evaluation of the uptake capacity and incorporation of the taken-up metabolites under  
266 ecologically relevant conditions.

267 *General patterns in the uptake of organic metabolites by the receiving diatom C. didymus*

268 Detailed analysis of the mass spectra allows to draw a picture of absorbotrophy in *C.*  
269 *didymus* (Fig. 4). More than a quarter of all detected metabolites in *C. didymus* were labeled to  
270 different degrees (Figure 1). Nearly 10 % showed the identical labeling pattern as those in the  
271  $^{13}\text{C}$ -labeled *S. costatum* metabolome. These metabolites are not (or only to a minor extent)  
272 synthesized by the receiver but taken up and maintained in the cells. The major part of taken-  
273 up metabolites showed mixed labeling, indicative for the uptake of a metabolite that is also  
274 synthesized by the receiver. This includes a wide range of natural products from small charged



275 molecules like choline and carnitine to non-polar lipids and fatty acids. Metabolites acquired  
276 from the outside water can thus be metabolized in the same way as the *de novo* produced  
277 compounds, indicating that no compartmentation of assimilated material occurs. Instead, the  
278 autotrophic and the phototrophic pool are used for anabolism and catabolism. For example, the  
279 presence of complex labeling patterns can be explained by the use of intermediate fatty acids  
280 in the anabolism of more complex lipids. The complex isotopologue pattern of oleic acid and  
281 11Z-eicosenoic acid, for example, might reflect a dynamic system with rounds of beta oxidation  
282 releasing labeled acetate and subsequent fatty acid re-assembly from this labeled and the own  
283 unlabeled acetate pool. Since the isotopologues of these fatty acids are not Bernoulli-distributed  
284 the relative amount of labeled acetate in the total acetate pool used for fatty acid biosynthesis  
285 might vary over time.

#### 286 *Utilization of assimilated metabolites*

287 The fact that uptake has no apparent preference for nitrogen containing metabolites contradicts  
288 the assumption that diatoms use specific heterotrophic mechanisms to acquire reduced nitrogen  
289 (19). Notably, many metabolites with essential physiological functions are thus not exclusively  
290 produced *de novo* but taken up in high proportions. Control of physiological concentrations will  
291 thus have to include biosynthesis, catabolism as well as uptake. A universal uptake could be  
292 highly advantageous in the event of a lysis of a competing algal bloom (10, 30). But even under  
293 regular conditions in plankton, algae might encounter metabolites released by other members  
294 of the phytoplankton that they can take up and benefit from (32).

295 The observation of universal uptake of metabolites requires re-thinking of the interpretation of  
296 incubation studies with single labeled substrates. It is well documented that specific primary  
297 metabolites can be taken up by the cells under limiting conditions. Thus, under darkness, uptake  
298 of organic acids like lactate and malate was observed (21). Amino acid assimilation after  
299 peptide lysis was interpreted as nitrogen uptake mechanism (19) and uptake of the essential  
300 metabolite dimethylsulfoniopropionate (DMSP) was discussed as a way to compensate for the  
301 lack of own DMSP biosynthetic capabilities (23). We now expand this view and introduce that  
302 diatoms can take up a structural variety of metabolites released from competitors even under  
303 optimized growth conditions. Thus no specific compensation mechanisms but rather universal  
304 complementation of the own metabolome occurs but rather an universal supply with potentially  
305 valuable metabolites. This unspecific uptake of metabolites over a wide range of polarities and  
306 masses newly defines diatoms as a general sink of organic carbon in the sea.

#### 307 *Physiological function of assimilated metabolites*

308           Of the multiple labeled metabolites, two groups will be exemplarily highlighted here,  
309 polar nitrogen containing metabolites and fatty acids. Polar metabolites that are taken up include  
310 glycine betaine,  $\beta$ -alanine betaine, carnitine and choline, with diverse physiological functions.  
311 Glycine betaine is a known osmolyte and uptake in diatoms has already been described under  
312 N-limited conditions (33, 34). Choline is a biosynthetic precursor of glycine betaine (35) and  
313 important as structural element in phospholipids (11). It has been found as a free form and in  
314 lysophosphatidylcholine in this study (Table 1). However, the labeling pattern of the choline  
315 fragment of lysophosphatidylcholine differs from the one of the free form (Suppl. Fig. 3),  
316 indicating different origins.  $\beta$ -alanine betaine is a known osmoprotectant in plants and is  
317 biosynthesized via the methylation of  $\beta$ -alanine, a building block of coenzyme A (36). It has  
318 also been found in marine algae (37). Carnitine is a central metabolite in energy metabolism of  
319 all eukaryotic cells. It plays an essential role for the transport of fatty acids across the  
320 mitochondrial membrane. The utilization of carnitine by diatoms has been reported previously  
321 by measuring oxidation rates in a biofilm-forming freshwater diatom (38). The presence of  
322 labeled *N*-methyl groups (Suppl. Fig. 4) excludes lysine degradation (39) as a metabolic origin.  
323 The high proportion of heterotrophically acquired carnitine and the presence of many fatty acids  
324 among the taken-up metabolites is striking. It suggests a highly active transport mechanism for  
325 these high-energy fatty acids and the *N*-containing carnitine. It would be interesting to  
326 investigate whether an acylcarnitine-type transport system might facilitate the uptake of fatty  
327 acids across the cellular membrane. The presence of a protein homologous to a class I  
328 carnitine/acylcarnitine translocase in a diatom cell wall proteome supports this hypothesis (40).  
329 Several labeled fatty acids and derivatives have also been identified (Table 1). Eicosapentaenoic  
330 acid is one of the dominant fatty acids in diatoms and precursor of many bioactive oxylipins  
331 (11, 41-43). 6*Z*,9*Z*,12*Z*-hexadecatrienoic acid is the precursor of octadienal, an allelopathic  
332 polyunsaturated aldehyde (44). Also, oleic acid, 11*Z*-eicosenoic acid, and 6*Z*,9*Z*,12*Z*,15-  
333 hexadecatetraenoic acid are common in diatoms (43, 45-48). Two other C18- and C20  
334 polyunsaturated fatty acids were identified according to retention time and mass spectra.  
335 Comparison with synthetic standards showed that these fatty acids were isomers of linoleic and  
336 arachidonic acid. Fatty acids and their derivatives have multiple physiological functions. The  
337 fact that they are present in labeled and unlabeled forms in after the incubation experiments  
338 indicates an unbiased utilization of de novo and assimilated compounds. This might serve as a  
339 mechanism to avoid costly biosynthesis of fatty acids, which is supported by the observation  
340 that the fatty acids are not only internalized or adsorbed to lipidic structures due to their  
341 physicochemical properties but rather incorporated into the primary metabolism of the diatom.

342 The broad range of polarity and molecular weight of assimilated compounds raises the  
343 question of the uptake mechanism. Candidate systems for fatty acid shuttling include specific  
344 transporters and genome data shows homolog candidate sequences (40, 49). But indeed, also  
345 unspecific absorption and incorporation mechanisms that do not require transporters will most  
346 likely be involved. Nevertheless, the question of how diatoms acquire exogenous metabolites  
347 is still open.

348

#### 349 *Concluding remarks*

350 The diatom *C. didymus* takes up and incorporates metabolites from lysed competitors with  
351 surprising little bias. The same is true for another model diatom *T. weissflogii*, which might  
352 suggest a rather universal mechanism. The multitude of cellular functions in which these  
353 metabolites are involved suggests that uptake complements the internal metabolic pool resulting  
354 from many different biosynthetic pathways.

355 The universal absorbotrophic lifestyle of one of the most abundant algal classes in the oceans  
356 substantially changes our view of the metabolic shuttling in phytoplankton communities. These  
357 algae take up not only a few highly polar metabolites for e.g. nitrogen supply. They rather  
358 complement their metabolism quite universally with resources from the surrounding seawater.  
359 This process occurs even under illumination and is not related to the complementation of  
360 lacking photosynthate in the dark. Thus, in addition to bacteria, diatoms compete for the  
361 dissolved organic carbon in the plankton (50, 51). Our study has consequences for element  
362 cycling in the oceans and ecosystem dynamics that will have to be addressed in the future.

363

## 364 **Materials and Methods**

365

### 366 *Experimental design*

367 Diatoms were grown under optimum conditions and exposed to a labeled metabolome of a  
368 competitor. The diatoms were extracted using optimized protocols for metabolomics sampling  
369 and extracts were analysed by liquid chromatography mass spectrometry to evaluate the uptake  
370 of labeled metabolites.

371

### 372 *Algal culturing*

373 *C. didymus* was isolated by W. Kooistra from the Gulf of Naples (Stazione Zoologica Anton  
374 Dohrn, Naples, Italy) and *S. costatum* was obtained from the Roscoff Culture Collection  
375 (Roscoff, France). Both algae were cultivated in batch culture using artificial seawater  
376 medium(52) in 50 mL Greiner Bio-One cell culture flasks at 11-13°C under a 14:10 h light :

377 dark regime with an illumination of 20-25  $\mu\text{mol photons m}^{-2} \text{s}^{-1}$ . Development of cultures was  
378 followed by *in-vivo* Chl *a* fluorescence using a Mithras LB 940 plate reader (excitation 430 nm,  
379 emission 665 nm).

380

### 381 *Global <sup>13</sup>C-labeling*

382 For global <sup>13</sup>C-labeling of *S. costatum* we used autoclaved artificial seawater medium that was  
383 prepared without addition of NaHCO<sub>3</sub>. An aliquot of this medium was utilized to dissolve  
384 NaH<sup>13</sup>CO<sub>3</sub> (98 atom %, Sigma-Aldrich, Munich, Germany). This solution, containing sufficient  
385 NaH<sup>13</sup>CO<sub>3</sub> to reach a final concentration of 2.38 mM, was sterile filtered (0.2  $\mu\text{m}$  pore size,  
386 Sarstedt Filtropur S) and transferred back to the medium bottle. Tissue culture flasks were filled  
387 to the neck in order to minimize the area for CO<sub>2</sub> exchange with the atmosphere and were  
388 inoculated with < 1 % (v/v) of a stationary *S. costatum* culture. After growing to stationary  
389 phase, an aliquot was taken and transferred to fresh <sup>13</sup>C-enriched medium (< 1 % (v/v)). After  
390 two of these cycles a plateau in the degree of labeling (verified by mass spectrometry as  
391 described below) was reached and the cultures were used for further experiments.

392

### 393 *Bacterial culturing*

394 *K. algicida* (30) was cultivated on marine broth agar at 30°C for 2 days. The bacterial lawn was  
395 removed with a sterile cotton swab and re-suspended in algal culturing medium to an OD<sub>550</sub> of  
396 0.5 determined on a Genesys 10S UV-Vis spectrophotometer (Thermo Fisher Scientific,  
397 Waltham, MA, USA).

398

### 399 *Co-culturing experiment and extraction of released metabolites*

400 *S. costatum* cultures reared in <sup>12</sup>C or <sup>13</sup>C medium were co-cultured in triplicates (185 mL each)  
401 with the *K. algicida* added to a final OD<sub>550</sub> of 0.01. After 6 days the lysed cultures were gently  
402 filtered (0.2  $\mu\text{m}$  pore size) and the flow-through extracted for metabolome analysis as follows.  
403 Solid phase extraction cartridges (Chromabond easy, Macherey-Nagel, Düren, Germany) were  
404 equilibrated with 4 mL of methanol (Chromasolv<sup>®</sup> Plus, Sigma-Aldrich, Munich, Germany)  
405 and 4 mL of water (Chromasolv<sup>®</sup> Plus, Sigma-Aldrich, Munich, Germany) before the filtrate  
406 (170 mL) was applied using vacuum with a flow rate < 1 L h<sup>-1</sup>. The cartridge was washed with  
407 4 mL water, air-dried and then extracted via gravity flow using 2 mL of methanol followed by  
408 2 mL of methanol/tetrahydrofuran 1:1 (tetrahydrofuran HiPerSolv, VWR, Dresden, Germany).  
409 This extract was frozen until further chemical analysis.

410

#### 411 *Tests for mixotrophy*

412 Stationary cultures (45 mL) of *S. costatum* reared in  $^{12}\text{C}$  or  $^{13}\text{C}$  medium were centrifuged (500  
413 x g, 15 min,  $10^\circ\text{C}$ ) and washed three times by repeated addition of 45 mL of  $^{12}\text{C}$  medium to the  
414 harvested pellets and centrifugation. After the third washing step the supernatant was collected  
415 as control medium (this was processed in parallel to the cells and later served as control for the  
416 natural  $^{13}\text{CO}_2$ ) and the cell pellet was re-suspended in 45 mL  $^{12}\text{C}$  medium. To disrupt cells, the  
417 suspension was frozen at  $-20^\circ\text{C}$ , thawed and treated in an ice-cold ultrasonic bath for 10 min.  
418 The lysate was filtered (1.2  $\mu\text{m}$  pore size, GF/C, Whatman, GE Healthcare, Little Chalfont,  
419 United Kingdom), acidified to  $\text{pH} \leq 1$  for sterilization using 30% hydrochloric acid, incubated  
420 at  $0^\circ\text{C}$  for 10 min and subsequently neutralized under sterile conditions using a saturated sodium  
421 hydroxide solution. The solutions were stored at  $-20^\circ\text{C}$  until use. After thawing, the solutions  
422 were diluted 1:1 with  $^{12}\text{C}$  medium to yield the final medium for the investigation of mixotrophy  
423 ( $^{12}\text{C}$  organic &  $^{12}\text{C}$  inorganic or  $^{13}\text{C}$  organic &  $^{12}\text{C}$  inorganic). 45 mL aliquots of both media  
424 were extracted as described above for exometabolomic analysis to determine the organic  
425 metabolites. For determination of mixotrophy 110 mL aliquots of these media were inoculated  
426 with 1% (v/v) stationary *C. didymus* culture in triplicates and cultivated for 3 days. Directly  
427 after inoculation and after 3 days of cultivation, samples (45 mL each) for intra- and  
428 extracellular metabolomics were processed. Samples were filtered (1.2  $\mu\text{m}$ , GF/C, Whatman,  
429 GE Healthcare, Little Chalfont, United Kingdom) and the flow-through processed for  
430 exometabolomic analysis as described above (see co-culturing experiment). The cells were  
431 washed off the filter with an ice-cold freshly prepared mixture of methanol/ethanol/chloroform  
432 (1:3:1) (ethanol LiChroSolv<sup>®</sup>, Merck, Darmstadt, Germany; chloroform HiPerSolv<sup>®</sup>, VWR,  
433 Dresden, Germany). Extracts were treated in an ultrasonic bath for 10 min, centrifuged (30,000  
434 x g, 15 min,  $4^\circ\text{C}$ ) and the supernatant was stored at  $-20^\circ\text{C}$ . As a control to prove that no  
435  $\text{NaH}^{13}\text{CO}_3$  enrichment was present in mixotrophic media, the third wash supernatant (see  
436 above) was used as medium to cultivate *C. didymus* and metabolites were extracted as  
437 described. A graphical representation of the experimental setup can be found in Suppl. Fig. 1.

438

#### 439 *Analysis of exo- and endometabolomes with LC-MS*

440 Extracts from cells and media (see above) were dried in a nitrogen flow at room temperature  
441 and were resuspended in up to 200  $\mu\text{L}$  methanol. Metabolites were separated on an UltiMate  
442 3000 UHPLC (Thermo Fisher Scientific, Waltham, MA, USA) equipped with an Accucore C18  
443 column (100x2.1 mm, 2.6  $\mu\text{m}$ ) at  $25^\circ\text{C}$  using water with 2% acetonitrile and 0.1% formic acid  
444 (A) and pure acetonitrile (B) as mobile phase. The gradient was as follows: 100% A for 0.2

445 min, linear gradient to 100% B in 7.8 min, 100% B for 3 min, linear gradient to 100% A in 0.1  
446 min, 100% A for 0.9 min. The UHPLC was connected to a QEplus Orbitrap mass spectrometer  
447 (Thermo Fisher Scientific, Waltham, MA, USA) equipped with heated electrospray ionization  
448 source (capillary temperature 360°C, sheath gas 60 nominal units, aux gas 20 nominal units,  
449 sweep gas 5 nominal units, aux gas temperature 400°C, spray voltage 3.3 kV, S-lens RF level  
450 50) operated in positive or negative ion mode. Full scan measurements ( $m/z$  100-1200,  
451 resolution 280k, AGC target  $3 \cdot 10^6$ , maxIT 900 ms) were performed separately for positive  
452 and negative ion mode. MS<sup>2</sup> scans with metabolite-specific fragmentation energies were used  
453 for metabolite identification.

454

#### 455 *Isotopologue detection*

456 Full scan RAW files were converted to mzXML using ProteoWizard msConvert (53) with the  
457 vendor's algorithm for peak picking. Isotopologue detection was achieved with R-based  
458 X<sup>13</sup>CMS (27). The R script can be found in the Supplementary Information. In brief, after peak-  
459 picking with centwave (3 ppp, peakwidth 5-20 s) and retention time alignment with orbiwarp,  
460 isotopologues with a mass difference of 1.00335 Da were assigned (RTwindow 10 s, 3 ppm).  
461 Either all isotopologue groups ( $\alpha = 1$ ) or only isotopologue groups significantly different from  
462 <sup>12</sup>C ( $\alpha = 0.05$ ) were reported. Afterwards, significantly increased isotopologue groups were  
463 manually curated with reference to the original spectrum in order to exclude groups that did not  
464 contain at least 3 consecutive isotopologues.

465

#### 466 *Compound identification*

467 Compounds were identified based on their retention time, high resolution mass to charge ratio  
468 and fragmentation pattern. Compound Discoverer (Vers. 2.1, Thermo Fisher Scientific,  
469 Waltham, MA, USA) was used to predict sum formula, search an in-house and public databases  
470 (ChemSpider and mzCloud) as well as calculate FISH scores of candidates. SIRIUS and  
471 CSI:FingerID were used to compute fragmentation trees and search molecular structure  
472 databases (54). Putatively identified compounds were compared to authentic standards:  
473 Arachidonic acid, betaine, carnitine hydrochloride, choline chloride, 11Z-eicosenoic acid, 2-  
474 hydroxytetradecanoic acid, isoleucine, leucine and 1-oleoyl-*sn*-glycero-3-phosphocholine were  
475 obtained from Sigma Aldrich (Munich, Germany). Oleic acid was purchased from AppliChem  
476 (Darmstadt, Germany). Linoleic acid was from Alfa Aesar (Haverhill, MA, USA).  
477 5Z,8Z,11Z,14Z,17Z-Eicosapentaenoic acid was supplied by Cayman Chemicals (Ann Arbor,  
478 MI, USA) and 6Z,9Z,12Z-Hexadecatrienoic acid from Larodan (Solna, Sweden). 6Z,9Z,12Z,15-

479 Hexadecatetraenoic acid has been synthesized according to Pohnert, Adolph and Wichard (45).  
480  $\beta$ -Alanine betaine has been synthesized according to Chary, Kumar, Vairamani and Prabhakar  
481 (55) Leucine and isoleucine were not baseline separated and are consequently grouped as  
482 (iso-)leucine.

483

#### 484 *Calculation of the degree of labeling*

485 To calculate the degree of labeling isotopologues are assumed to have a Bernoulli distribution  
486 (see Supplementary Information for formula).(56) Measured isotopologue intensities are  
487 compared to computed distributions and the squared coefficient of variation between both is  
488 minimized in an iterative process.

489

#### 490 **References**

- 491 1. Heesen, W., *Planktonkunde - Eine Einführung in die Ökologie der im Wasser*  
492 *schwebenden Kleinwelt*. E. Wasserloos, G. Wolff, Eds., Mathematisch-  
493 Naturwissenschaftlich-Technische Bücherei (Verlag Otto Salle, Berlin, 1928), vol. 23.
- 494 2. Selosse, M. A., Charpin, M., Not, F., Mixotrophy everywhere on land and in water:  
495 the grand ecart hypothesis. *Ecol. Lett.* 20, 246-263 (2017).
- 496 3. Stoecker, D. K., Hansen, P. J., Caron, D. A., Mitra, A., Annual, R., “Mixotrophy in  
497 the Marine Plankton” *Annu. Rev. of Mar. Sci.* 9, 311-335 (2017) .
- 498 4. Flynn, K. J. *et al.*, Misuse of the phytoplanktonzooplankton dichotomy: the need to  
499 assign organisms as mixotrophs within plankton functional types. *J. Plankton Res.* 35,  
500 3-11 (2013).
- 501 5. Neilson, A. H., Lewin, R. A., The uptake and utilization of organic carbon by algae:  
502 an essay in comparative biochemistry. *Phycologia* 13, 227-264 (1974).
- 503 6. Amblard, C., Carbon Heterotrophic Activity of Microalgae and Cyanobacteria -  
504 Ecological Significance. *Annee Biologique* 30, 6-107 (1991).
- 505 7. Caron, D. A., Mixotrophy stirs up our understanding of marine food webs. *Proc. Natl.*  
506 *Acad. Sci. U.S.A.* 113, 2806-2808 (2016).
- 507 8. Karlusich, J. J. P., Ibarbalz, F. M., Bowler, C., Phytoplankton in the Tara Ocean.  
508 *Annu. Rev. Mar. Sci.* 12, 233-265 (2020).
- 509 9. Mocaer, P. Y., Baudoux, A. C., The essential role of viruses in marine ecology.  
510 *Virologie* 21, 160-172 (2017).
- 511 10. Meyer, N., Bigalke, A., Kaulfuss, A., Pohnert, G., Strategies and ecological roles of  
512 algicidal bacteria. *FEMS Microbiol. Rev.* 41, 880-899 (2017).

- 513 11. Borowitzka, M., *The physiology of microalgae* (Springer Berlin Heidelberg, New  
514 York, NY, 2016).
- 515 12. Burkholder, J. M., Glibert, P. M., Skelton, H. M., Mixotrophy, a major mode of  
516 nutrition for harmful algal species in eutrophic waters. *Harmful Algae* 8, 77-93 (2008).
- 517 13. Ferroni, L., Giovanardi, M., Poggioli, M., Baldisserotto, C., Pancaldi, S., Enhanced  
518 photosynthetic linear electron flow in mixotrophic green microalga *Ettlia*  
519 *oleoabundans* UTEX 1185. *Plant Phys. Biochem.* 130, 215-223 (2018).
- 520 14. Flynn, K. J. *et al.*, Misuse of the phytoplankton–zooplankton dichotomy: the need to  
521 assign organisms as mixotrophs within plankton functional types. *J. Plankton Res.* 35,  
522 3-11 (2013).
- 523 15. Raven, J. A., Beardall, J., Flynn, K. J., Maberly, S. C., Phagotrophy in the origins of  
524 photosynthesis in eukaryotes and as a complementary mode of nutrition in  
525 phototrophs: relation to Darwin’s insectivorous plants. *J. Exper. Bot.* 60, 3975-3987  
526 (2009).
- 527 16. Petrou, K., Nielsen, D. A., Uptake of dimethylsulphoniopropionate (DMSP) by the  
528 diatom *Thalassiosira weissflogii*: a model to investigate the cellular function of  
529 DMSP. *Biogeochemistry* 141, 265-271 (2018).
- 530 17. Cochlan, W. P., Herndon, J., Kudela, R. M., Inorganic and organic nitrogen uptake by  
531 the toxigenic diatom *Pseudo-nitzschia australis* (Bacillariophyceae). *Harmful Algae* 8,  
532 111-118 (2008).
- 533 18. Vila-Costa, M. *et al.*, Dimethylsulphoniopropionate uptake by marine phytoplankton.  
534 *Science* 314, 652-654 (2006).
- 535 19. Mulholland, M. R., Lee, C., Peptide hydrolysis and the uptake of dipeptides by  
536 phytoplankton. *Limnol. Oceanogr.* 54, 856-868 (2009).
- 537 20. Hellebust, J. A., Guillard, R. R., Uptake Specificity for Organic Substrates by the  
538 Marine Diatom *Melosira Nummuloides*(1). *J. Phycol.* 3, 132-136 (1967).
- 539 21. Hellebust, J. A., Lewin, J., Transport systems for organic acids induced in the marine  
540 pennate diatom, *Cylindrotheca fusiformis*. *Can. J. Microbiol.* 18, 225-233 (1972).
- 541 22. Lewin, J. C., Lewin, R. A., Auxotrophy and heterotrophy in marine littoral diatoms.  
542 *Can. J. Microbiol.* 6, 127-134 (1960).
- 543 23. Spielmeier, A., Gebser, B., Pohnert, G., Investigations of the uptake of  
544 dimethylsulphoniopropionate by phytoplankton. *ChemBioChem* 12, 2276-2279 (2011).



- 545 24. Paul, C., Pohnert, G., Interactions of the algicidal bacterium *Kordia algicida* with  
546 diatoms: regulated protease excretion for specific algal lysis. *PLoS One* 6, e21032  
547 (2011).
- 548 25. Paul, C., Pohnert, G., Induction of protease release of the resistant diatom *Chaetoceros*  
549 *didymus* in response to lytic enzymes from an algicidal bacterium. *PLoS One* 8,  
550 e57577 (2013).
- 551 26. Bigalke, A., Meyer, N., Papanikolopoulou, L. A., Wiltshire, K. H., Pohnert, G., The  
552 Algicidal Bacterium *Kordia algicida* Shapes a Natural Plankton Community. *Appl.*  
553 *Environ. Microbiol.* 85 (2019).
- 554 27. Huang, X. J. *et al.*, (XCMS)-C-13: Global Tracking of Isotopic Labels in Untargeted  
555 Metabolomics. *Anal. Chem.* 86, 1632-1639 (2014).
- 556 28. Pohnert, G., Jung, V., Intracellular compartmentation in the biosynthesis of  
557 caulerpenyne: Study on intact macroalgae using stable-isotope-labeled precursors.  
558 *Org. Lett.* 5, 5091-5093 (2003).
- 559 29. Bigalke, A., Pohnert, G., Algicidal bacteria trigger contrasting responses in model  
560 diatom communities of different composition. *MicrobiologyOpen* 8 (2019).
- 561 30. Sohn, J. H. *et al.*, *Kordia algicida* gen. nov., sp nov., an algicidal bacterium isolated  
562 from red tide. *Int. J. System. Evol. Microbiol.* 54, 675-680 (2004).
- 563 31. Barofsky, A. *et al.*, Growth phase of the diatom *Skeletonema marinoi* influences the  
564 metabolic profile of the cells and the selective feeding of the copepod *Calanus* spp. *J.*  
565 *Plankton Res.* 32, 263-272 (2010).
- 566 32. Sommer, U. *et al.*, Beyond the Plankton Ecology Group (PEG) Model: Mechanisms  
567 Driving Plankton Succession. *Annu. Rev. Ecol. Evol. Systemat.*, 43, 429-448 (2012).
- 568 33. Keller, M. D., Kiene, R. P., Matrai, P. A., Bellows, W. K., Production of glycine  
569 betaine and dimethylsulfoniopropionate in marine phytoplankton. II. N-limited  
570 chemostat cultures. *Mar. Bio.* 135, 249-257 (1999).
- 571 34. Gebser, B., Pohnert, G., Synchronized Regulation of Different Zwitterionic  
572 Metabolites in the Osmoadaptation of Phytoplankton. *Mar. Drugs* 11, 2168-2182  
573 (2013).
- 574 35. Kageyama, H., Tanaka, Y., Takabe, T., Biosynthetic pathways of glycinebetaine in  
575 *Thalassiosira pseudonana*; functional characterization of enzyme catalyzing three-step  
576 methylation of glycine. *Plant Physiol. Biochem.* 127, 248-255 (2018).
- 577 36. Rathinasabapathi, B., Fouad, W. M., Sigua, C. A., beta-Alanine betaine synthesis in  
578 the Plumbaginaceae. Purification and characterization of a trifunctional, S-adenosyl-L-

- 579 methionine-dependent N-methyltransferase from *Limonium latifolium* leaves. *Plant*  
580 *Physiol.* 126, 1241-1249 (2001).
- 581 37. Blunden, G. *et al.*, NMR-Spectra of Betaines from Marine-Algae. *Magn. Resonance*  
582 *Chem.* 24, 965-971 (1986).
- 583 38. Tuchman, N. C., Schollett, M. A., Rier, S. T., Geddes, P., Differential heterotrophic  
584 utilization of organic compounds by diatoms and bacteria under light and dark  
585 conditions. *Hydrobiologia* 561, 167-177 (2006).
- 586 39. Paik, W. K., Nochumson, S., Kim, S., Carnitine Biosynthesis Via Protein Methylation.  
587 *Trends Biochem. Sci.* 2, 159-161 (1977).
- 588 40. Frigeri, L. G., Radabaugh, T. R., Haynes, P. A., Hildebrand, M., Identification of  
589 proteins from a cell wall fraction of the diatom *Thalassiosira pseudonana* - Insights  
590 into silica structure formation. *Mol. Cell. Proteomics* 5, 182-193 (2006).
- 591 41. Rettner, J., Werner, M., Meyer, N., Werz, O., Pohnert, G., Survey of the C20 and C22  
592 oxylipin family in marine diatoms. *Tetrahedron Lett.* 59, 828-831 (2018).
- 593 42. Pohnert, G., Boland, W., The oxylipin chemistry of attraction and defense in brown  
594 algae and diatoms. *Nat. Prod. Rep.* 19, 108-122 (2002).
- 595 43. Zulu, N. N., Zienkiewicz, K., Vollheyde, K., Feussner, I., Current trends to  
596 comprehend lipid metabolism in diatoms. *Prog. Lipid Res.* 70, 1-16 (2018).
- 597 44. D'Ippolito, G. *et al.*, Production of octadienal in the marine diatom *Skeletonema*  
598 *costatum*. *Org Lett* 5, 885-887 (2003).
- 599 45. Pohnert, G., Adolph, S., Wichard, T., Short synthesis of labeled and unlabeled  
600 6Z,9Z,12Z,15-hexadecatetraenoic acid as metabolic probes for biosynthetic studies on  
601 diatoms. *Chem. Phys. Lipids* 131, 159-166 (2004).
- 602 46. Ackman, R. G., Tocher, C. S., McLachla, J., Marine Phytoplankter Fatty Acids. *J.*  
603 *Fisheries Res. Board Canada* 25, 1603-& (1968).
- 604 47. Dunstan, G. A., Volkman, J. K., Barrett, S. M., Leroi, J. M., Jeffrey, S. W., Essential  
605 polyunsaturated fatty-acids from 14 Species of Diatom (Bacillariophyceae).  
606 *Phytochemistry* 35, 155-161 (1994).
- 607 48. Chen, Y. C., The biomass and total lipid content and composition of twelve species of  
608 marine diatoms cultured under various environments. *Food Chem.* 131, 211-219  
609 (2012).
- 610 49. Indiveri, C. *et al.*, The mitochondrial carnitine/acylcarnitine carrier: Function,  
611 structure and physiopathology. *Mol. Asp. Med.* 32, 223-233 (2011).

- 612 50. Georges, A. A., El-Swais, H., Craig, S. E., Li, W. K. W., Walsh, D. A.,  
613 Metaproteomic analysis of a winter to spring succession in coastal northwest Atlantic  
614 Ocean microbial plankton. *ISME J* 8, 1301-1313 (2014).
- 615 51. Berge, T., Poulsen, L. K., Moldrup, M., Daugbjerg, N., Hansen, P. J., Marine  
616 microalgae attack and feed on metazoans. *ISME J* 6, 1926-1936 (2012).
- 617 52. Maier, I., Calenberg, M., Effect of Extracellular Ca<sup>2+</sup> and Ca<sup>2+</sup>-Antagonists on the  
618 Movement and Chemoorientation of Male Gametes of *Ectocarpus-Siliculosus*  
619 (Phaeophyceae). *Bot. Acta* 107, 451-460 (1994).
- 620 53. Kessner, D., Chambers, M., Burke, R., Agusand, D., Mallick, P., ProteoWizard: open  
621 source software for rapid proteomics tools development. *Bioinformatics* 24, 2534-  
622 2536 (2008).
- 623 54. Duhrkop, K., Shen, H., Meusel, M., Rousu, J., Bocker, S., Searching molecular  
624 structure databases with tandem mass spectra using CSI:FingerID. *Proc. Natl. Acad.*  
625 *Sci. U.S.A.* 10.1073/pnas.1509788112 (2015).
- 626 55. Chary, V. N., Kumar, C. D., Vairamani, M., Prabhakar, S., Characterization of amino  
627 acid-derived betaines by electrospray ionization tandem mass spectrometry. *J. Mass*  
628 *Spectrom.* 47, 79-88 (2012).
- 629 56. Zachmann, H. G., *Mathematik für Chemiker* (VCH, Weinheim ; New York, ed. 5.,  
630 erw. Aufl., 1994), pp. xviii, 700 p.
- 631 57. Sumner, L. W. *et al.*, Proposed minimum reporting standards for chemical analysis  
632 Chemical Analysis Working Group (CAWG) Metabolomics Standards Initiative  
633 (MSI). *Metabolomics* 3, 211-221 (2007).

634

635

### 636 **Acknowledgments**

637 We thank W. Kooistra for providing diatom cultures. David Russo is acknowledged for helpful  
638 comments on an initial draft of this manuscript.

639

640 **Funding:** Deutsche Forschungsgemeinschaft (DFG) - SFB 1127/2 ChemBioSys – 239748522  
641 Deutsche Forschungsgemeinschaft (DFG) EXC 2051 – Project-ID 390713860.

642

643 **Author contributions:** N.M. developed the pipeline and analyzed the data. A.R. acquired and  
644 analyzed data. N.M. and G.P. conceived the study, directed all experiments, and wrote the  
645 manuscript with contributions from the co-author. All authors approved the manuscript.

646

647 **Competing interests:** Authors declare that they have no competing interests.

648

649 **Data and materials availability:** All mass spectra are deposited in the EMBL metabolomics  
650 data repository Metabolights. All computer code (in R) developed for this study is available in  
651 the supplementary information.

652

653 **Supporting Information:** This article contains supporting information online at...

654

655

656

657 **Figures and Tables**

658

659 **Fig. 1: Labeling of metabolites in *Chaetoceros didymus* endometabolome after exposure to**  
660 **metabolites from lysed labeled *S. costatum*.** (A) Isotopologue groups were detected and tested  
661 for significance using X<sup>13</sup>CMS. (B) After manual curation the remaining 548 isotopologue  
662 groups were categorized according to their labeling pattern. (C) Isotopologue distributions in  
663 metabolites with natural and enriched <sup>13</sup>C abundance are depicted for each category. (D)  
664 Isotopologue groups were clustered by retention time and *m/z* range. A dot plot showing the  
665 correlation between retention time and *m/z* can be found in Suppl. Fig. 2.

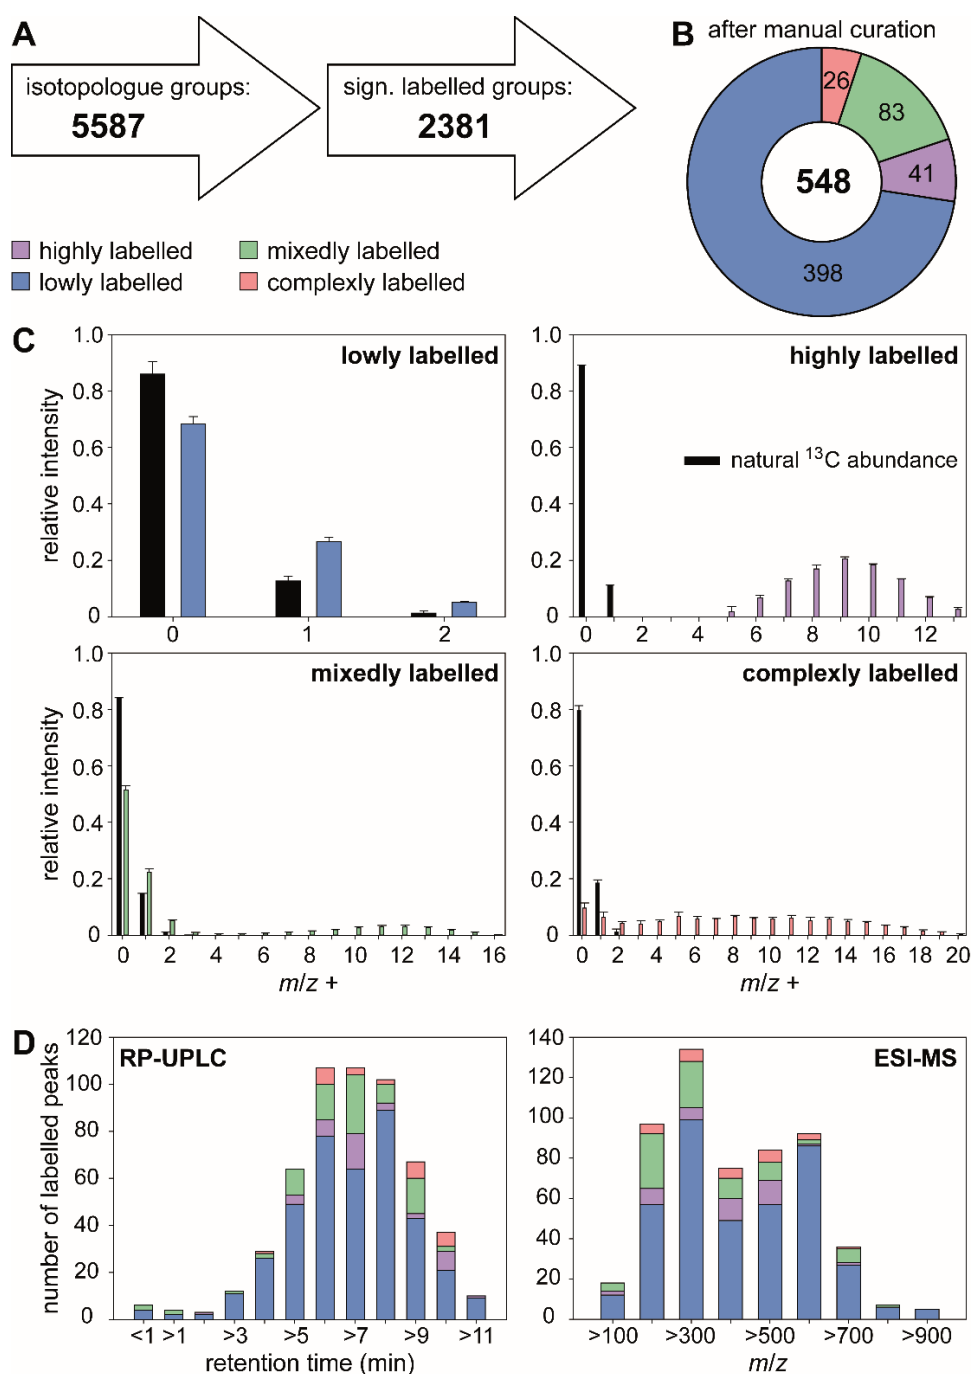

666

667 **Fig. 2: Labeling pattern of hexadecatetraenoic acid.** (A) A mixed labeled metabolite was  
668 identified as 6Z,9Z,12Z,15-hexadecatetraenoic acid. For data evaluation the measured mass  
669 spectrum (black bars in D) was divided into a lowly labeled (B) and a highly labeled pool (C).  
670 (B) Modelling (grey bars) shows that the lowly labeled pool contains 2.8 %  $^{13}\text{C}$  and thus likely  
671 derives from anabolism. (C) The highly labeled pool is taken up from the medium, black bars  
672 represent measured data of cellular hexadecatetraenoic acid, white bars measured data of  
673 hexadecatetraenoic acid in medium. (D) The measured mass spectrum in D can be explained  
674 by 20% hexadecatetraenoic acid derived from uptake and 80% from *de novo* synthesis (grey  
675 bars). All data are mean  $\pm$  SD from biological triplicates.

676

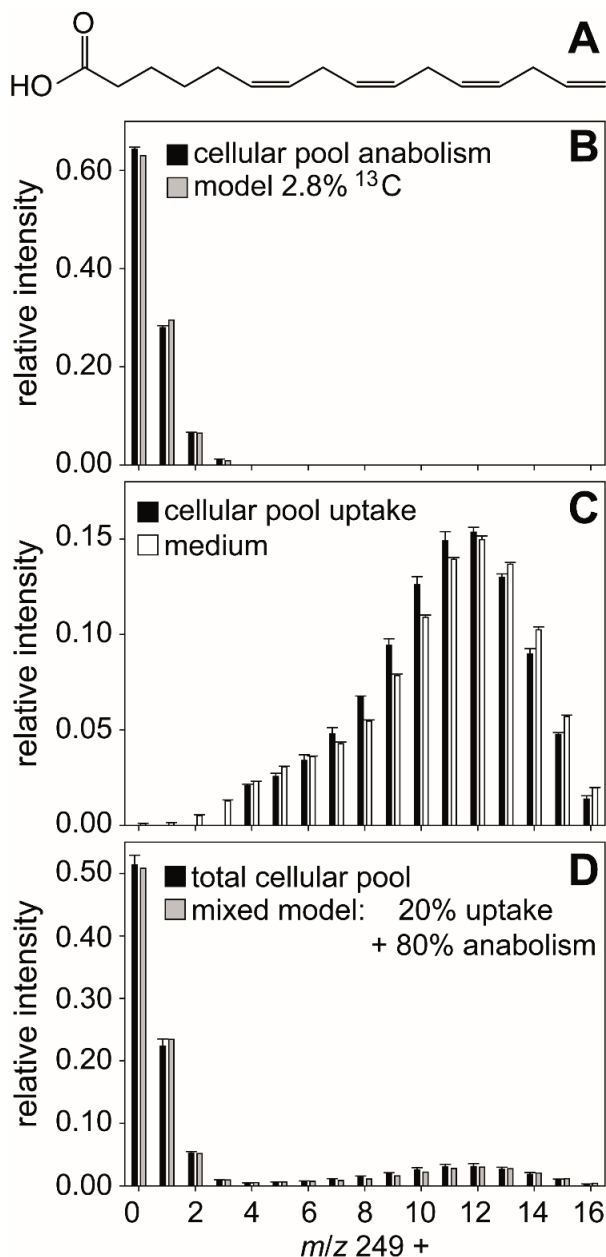

677

678

679 **Fig. 3: Complex labeling of lysophosphatidylcholine.** All isotopologues (B) of  
680 lysophosphatidylcholine (A) are fragmented to yield labeling of the building blocks oleic acid  
681 (C) and choline (D). Fragmentation of lysophosphatidylcholine M+8 isotopologue (black bar  
682 in B) yields oleic acid (E) with less than four  $^{13}\text{C}$ , thereby indirectly proving the labeling of  
683 glycerol.

684

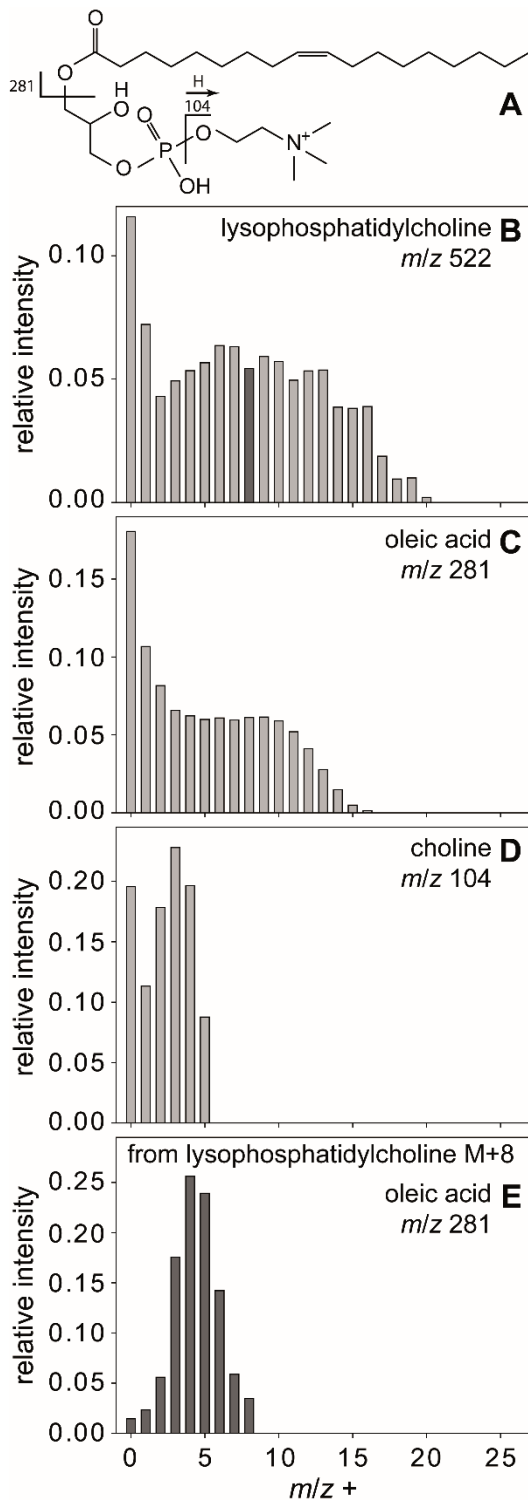

685

686

687 **Fig. 4: Uptake and metabolism of labeled organic compounds by *Chaetoceros didymus*.**  
688 Organic compounds labeled with  $^{13}\text{C}$  (red) are taken up and transformed. Labeled compounds  
689 and their catabolic products are mixed with unlabeled metabolites (black) from autotrophic  
690 metabolism in anabolic reactions.

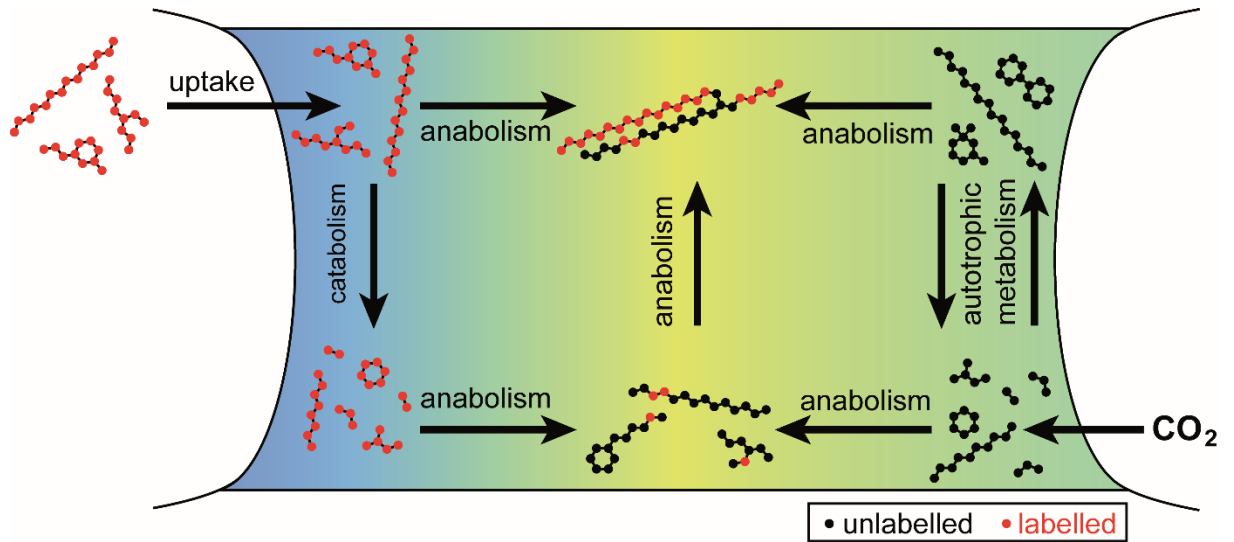

691

692



693 **Table 1: Labeled metabolites identified in the endometabolome of *Chaetoceros didymus*.** *m/z*, mass to charge ratio; RT, retention time; labeling according to categories in  
694 Fig. 2; Uptake in % referring to the total amount of the respective metabolite; presence of the metabolite in the medium enriched with the *S. costatum* metabolome; presence in  
695 medium after lysis of *S. costatum* by *K. algicida*; level of identification according to Sumner, *et al.* (57), level 1 identified compound, level 3 putatively characterized  
696 compound class.

| metabolite                                              | Ion                | <i>m/z</i> | RT<br>(min) | Labeling | Uptake | Presence in<br>mixotrophic<br>medium | lysed by<br><i>K. algicida</i> * | Level of<br>identification |
|---------------------------------------------------------|--------------------|------------|-------------|----------|--------|--------------------------------------|----------------------------------|----------------------------|
| choline                                                 | [M+H] <sup>+</sup> | 104.1069   | 0.66        | mixed    | 15 %   | +                                    | -                                | 1                          |
| carnitine                                               | [M+H] <sup>+</sup> | 162.1125   | 0.66        | mixed    | 58 %   | -                                    | -                                | 1                          |
| β-alanine betaine                                       | [M+H] <sup>+</sup> | 132.1019   | 0.69        | mixed    | 53 %   | -                                    | -                                | 1                          |
| betaine                                                 | [M+H] <sup>+</sup> | 118.0862   | 0.71        | mixed    | 73 %   | -                                    | -                                | 1                          |
| ( <i>iso</i> -)leucine                                  | [M+H] <sup>+</sup> | 132.1020   | 1.05        | mixed    | 8 %    | +                                    | -                                | 1                          |
| 6Z,9Z,12Z,15-hexadecatetraenoic acid                    | [M+H] <sup>+</sup> | 249.1847   | 7.17        | mixed    | 20 %   | +                                    | +                                | 1                          |
| isomer of 1-oleoyl- <i>sn</i> -glycero-3-phosphocholine | [M+H] <sup>+</sup> | 522.3554   | 7.25        | complex  | (76 %) | -                                    | -                                | 3                          |
| 1-oleoyl- <i>sn</i> -glycero-3-phosphocholine           | [M+H] <sup>+</sup> | 522.3549   | 7.47        | complex  | (76 %) | -                                    | -                                | 1                          |
| 2-hydroxytetradecanoic acid                             | [M-H] <sup>-</sup> | 243.1965   | 7.51        | mixed    | 4 %    | +                                    | +                                | 1                          |
| 6Z,9Z,12Z-hexadecatrienoic acid                         | [M+H] <sup>+</sup> | 251.2004   | 7.59        | mixed    | 8 %    | +                                    | +                                | 1                          |
| 5Z,8Z,11Z,14Z,17Z-eicosapentaenoic acid                 | [M-H] <sup>-</sup> | 301.2174   | 8.15        | mixed    | 3 %    | +                                    | +                                | 1                          |
| isomer of arachidonic acid                              | [M-H] <sup>-</sup> | 303.2330   | 8.48        | mixed    | 6 %    | +                                    | -                                | 3                          |
| isomer of linoleic acid                                 | [M-H] <sup>-</sup> | 279.2329   | 8.88        | mixed    | 79 %   | +                                    | +                                | 3                          |
| oleic acid                                              | [M-H] <sup>-</sup> | 281.2486   | 9.39        | complex  | (41 %) | +                                    | +                                | 1                          |
| 11Z-eicosenoic acid                                     | [M-H] <sup>-</sup> | 309.2801   | 10.23       | complex  | (52 %) | -                                    | -                                | 1                          |

697 \*released from *S. costatum* during lysis by *K. algicida*

698

699

700

701 **Supplementary Materials**

702

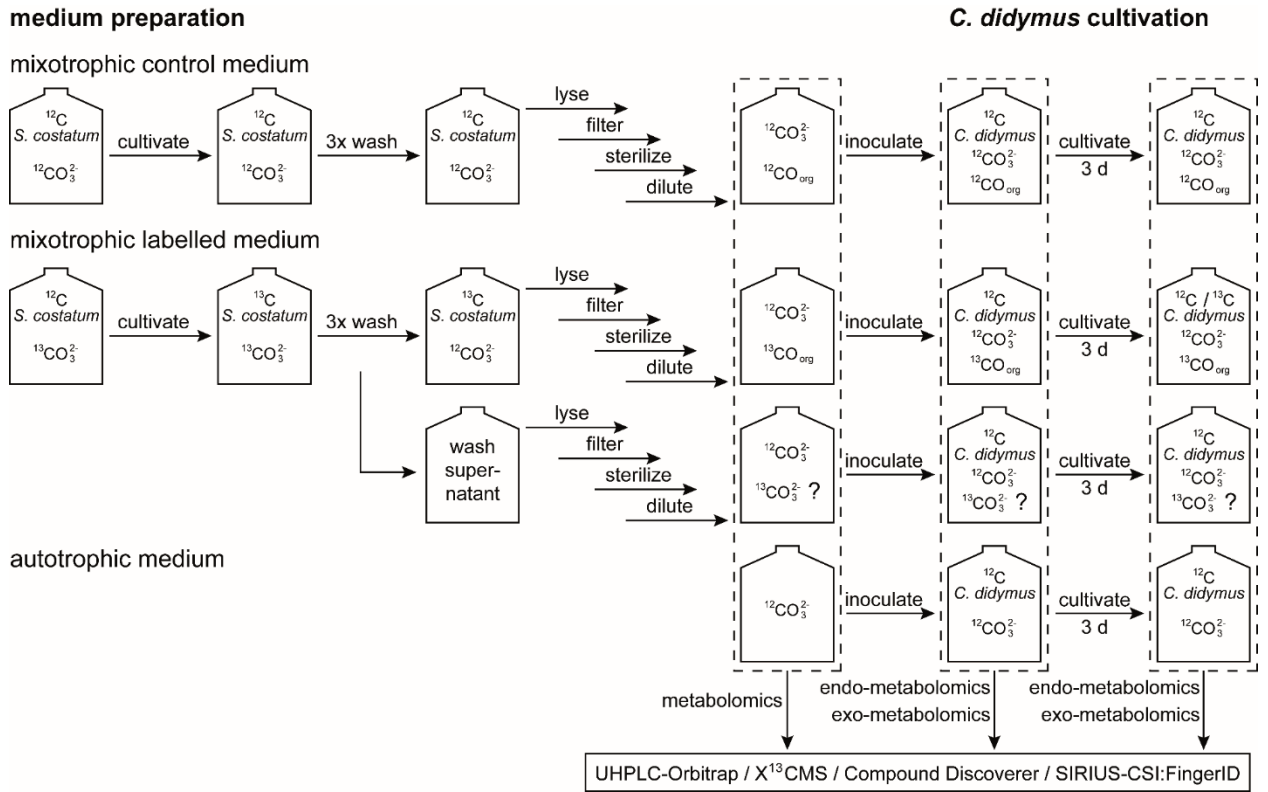

703

704

705

706

707

**Fig. S1.** Experimental setup for mixotrophy experiment. Last two lines: To demonstrate the effective removal of inorganic  $^{13}\text{C}$ , *C. didymus* was grown on the wash supernatant and did not contain labelled metabolites

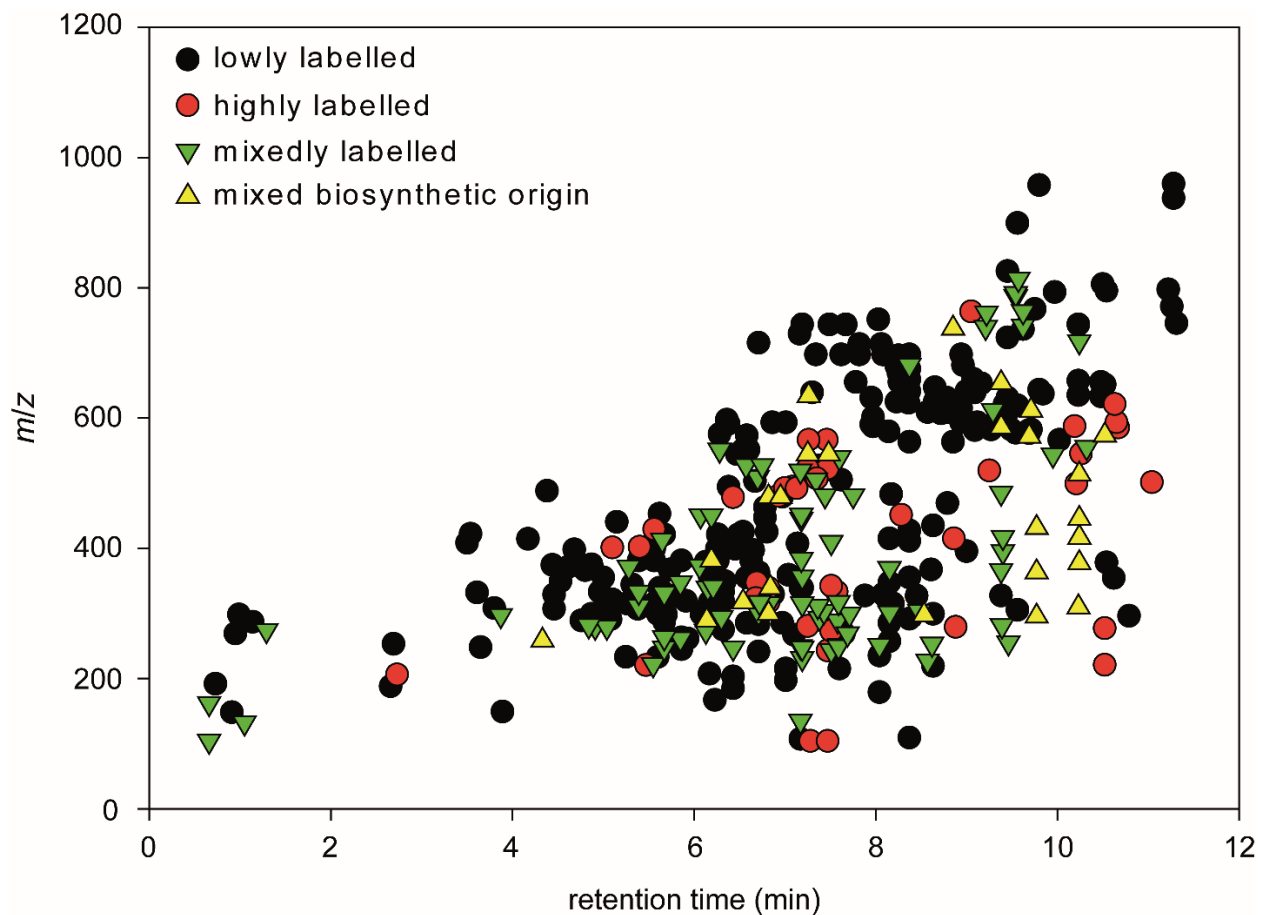

708  
709  
710  
711  
712

**Fig. S2.** Labelling of metabolites in *Chaetoceros didymus* endometabolome. Correlation between retention time (gradient as described in materials and methods) and  $m/z$  of manually curated isotopologue groups sorted by labelling pattern as described in Fig. 1.

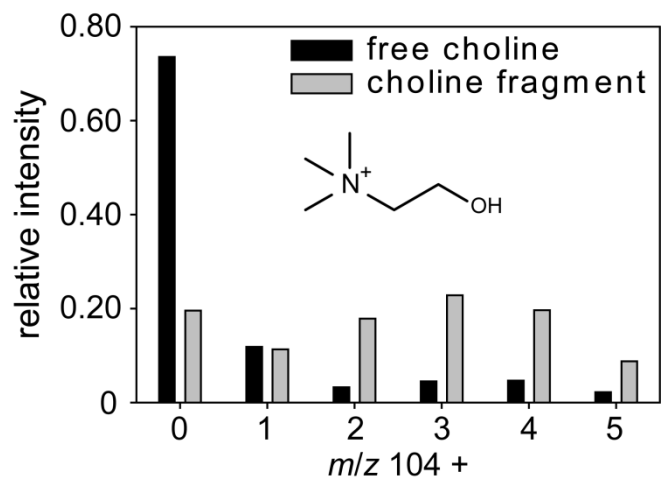

713

714 **Fig. S3.** Labelling pattern of carnitine. Depicted are the isotopologues of carnitine. The presence  
715 of M+5 to M+7 proves labelled *N*-methyl groups.

716

```

717 R-script for X13CMS analysis
718 require(xcms)
719 require(X13CMS)
720 # set working directory to one where the "C12" and "C13" folders reside
721 setwd("E:/X13CMS")
722 # Peak-picking and retention-time alignment with XCMS
723 xs= xcmsSet( c('./C12', './C13'), method= 'centWave', ppm= 3, peakwidth= c(5, 20))
724 xs= group(xs, bw=5, mzwid=0.015)
725 xs2= retcor(xs, method= 'obiwarp')
726 xs2= group(xs2, bw=5, mzwid=0.025)
727 xs3= fillPeaks(xs2)
728 # Setting variables for X13CMS
729 sN = rownames(xs3@phenoData) # sample names
730 sN = sN[c(1:3, 4:6)] # samples (3 unlabeled, 3 labeled)
731 # -----only significantly different isotopologues -----
732 # labeling report for samples:
733 labelsSign = getIsoLabelReport(xcmsSet = xs3, sampleNames = sN, unlabeledSamples = "C12", labeledSamples = "C13",
734 isotopeMassDiff = 1.00335, RTwindow = 10, ppm = 3, massOfLabeledAtom = 12, noiseCutoff = 10000, intChoice =
735 "intb", varEq = FALSE, alpha = 0.05, singleSample = FALSE, compareOnlyDistros = FALSE, monotonicityTol = FALSE,
736 enrichTol = 0.1)
737 # in each of the sN variables, the first 3 samples listed are of the "C12" or unlabeled type while the next 3 are of the "C13"
738 type
739 classes = c(rep("C12",3), rep("C13",3))
740 # print labeling report to a text file (recommended to open in Excel)
741 printIsoListOutputs(listReport = labelsSign, outputfile = "significant/labels_sign.txt")
742 # print pdf of isotopologue groups in a single labeling report plotted as relative intensity distributions
743 plotLabelReport(isoLabelReport = labelsSign, intOption = "rel", classes, labeledSamples = "C13", outputfile =
744 "significant/labelsrel_sign.pdf")
745 # print pdf of isotopologue groups in a single labeling report plotted as absolute intensity distributions
746 plotLabelReport(isoLabelReport = labelsSign, intOption = "abs", classes, labeledSamples = "C13", outputfile =
747 "significant/labelsabs_sign.pdf")
748 # -----all isotopologues -----
749 # labeling report for samples:
750 labelsAll = getIsoLabelReport(xcmsSet = xs3, sampleNames = sN, unlabeledSamples = "C12", labeledSamples = "C13",
751 isotopeMassDiff = 1.00335, RTwindow = 10, ppm = 3, massOfLabeledAtom = 12, noiseCutoff = 10000, intChoice =
752 "intb", varEq = FALSE, alpha = 1, singleSample = FALSE, compareOnlyDistros = FALSE, monotonicityTol = FALSE,
753 enrichTol = 0.1)
754 # in each of the sN variables, the first 3 samples listed are of the "C12" or unlabeled type while the next 3 are of the "C13"
755 type
756 classes = c(rep("C12",3), rep("C13",3))
757 # print labeling report to a text file (recommended to open in Excel)
758 printIsoListOutputs(listReport = labelsAll, outputfile = "all/labels_all.txt")
759 # print pdf of isotopologue groups in a single labeling report plotted as relative intensity distributions
760 plotLabelReport(isoLabelReport = labelsAll, intOption = "rel", classes, labeledSamples = "C13", outputfile =
761 "all/labelsrel_all.pdf")
762 # print pdf of isotopologue groups in a single labeling report plotted as absolute intensity distributions
763 plotLabelReport(isoLabelReport = labelsAll, intOption = "abs", classes, labeledSamples = "C13", outputfile =
764 "all/labelsabs_all.pdf")
765

```

766 Bernoulli statistics to calculate the degree of labelling

$$767 \quad I(m) = \frac{n!}{m!(n-m)!} \cdot p^m \cdot (1-p)^{n-m}$$

768 For a metabolite with  $n$  carbon atoms the intensity of an isotopologue  $I(m)$  with  $m$  <sup>13</sup>C atoms is calculated using the  
769 degree of labelling  $p$ .

770  
771
